# Supplementary material for: Green synthesis of 1-phenyl-1-ortho-xylene ethane in IL and reaction mechanism
Source: Royal Society of Chemistry journal article supplement (doi:10.1039/c6ra28009a), 2017-01-01
Supplement: c6ra28009a1.pdf [file c6ra28009a1.pdf]

## SUPPORTING INFORMATION

### **Study on a green synthesis of 1-phenyl-1-xylene ethane in ILs and reaction mechanism**

*Xuejun Sun<sup>1</sup>, Xinming Zhou<sup>2</sup>, Bobo Cao<sup>1</sup>, Ziping Cao<sup>1,\*</sup>, Hui Fu<sup>2,\*</sup>*

<sup>1</sup> School of Chemistry and Chemical Engineering, Qufu Normal University, Shandong, Qufu  
273165, P. R. China

<sup>2</sup> State Key laboratory of Heavy Oil Processing, College of Science, China University of  
Petroleum, Shandong, Qingdao 266580, P. R. China

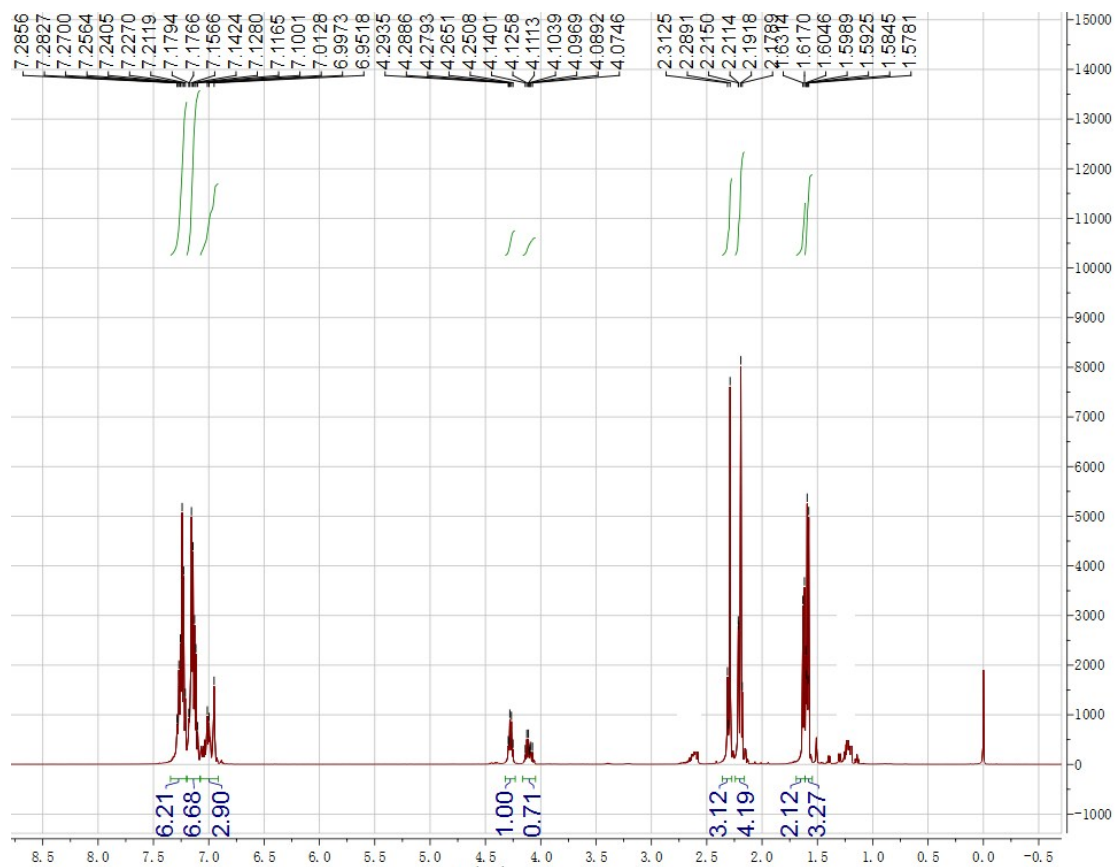

Fig. S1. Experimental  $^1\text{H}$  NMR spectrum of and BPEX with the 1:0.36 ratio.

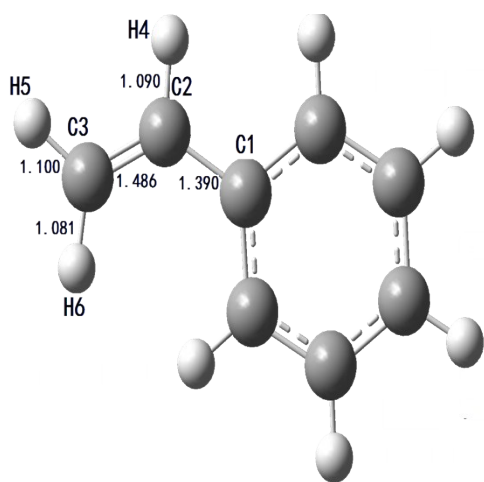

Styrene

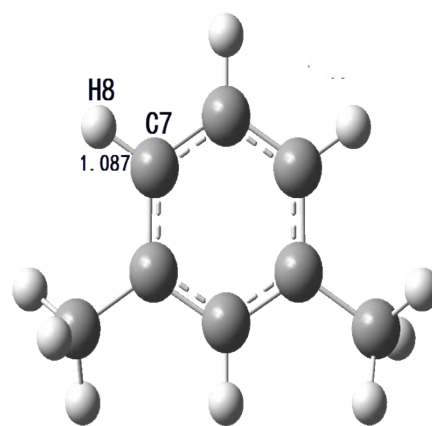

ortho-Xylene

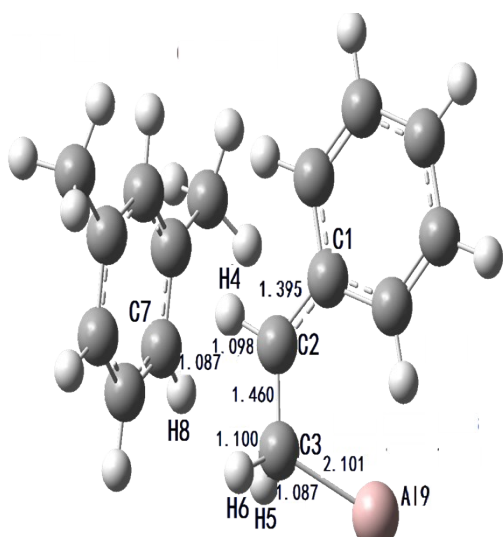

Intermediate

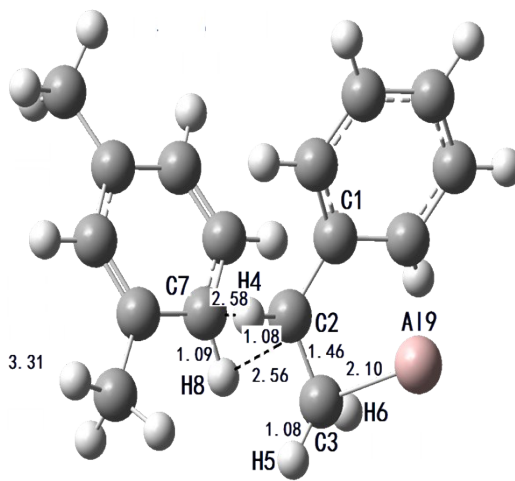

Transition state

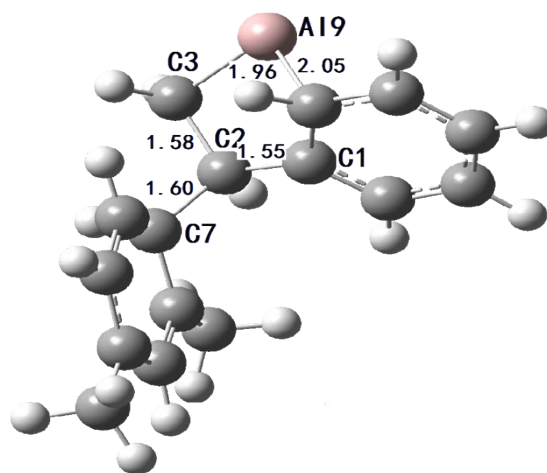

Product

**Fig. S2.** geometrical parameters involving various species of R, IM, TS and P

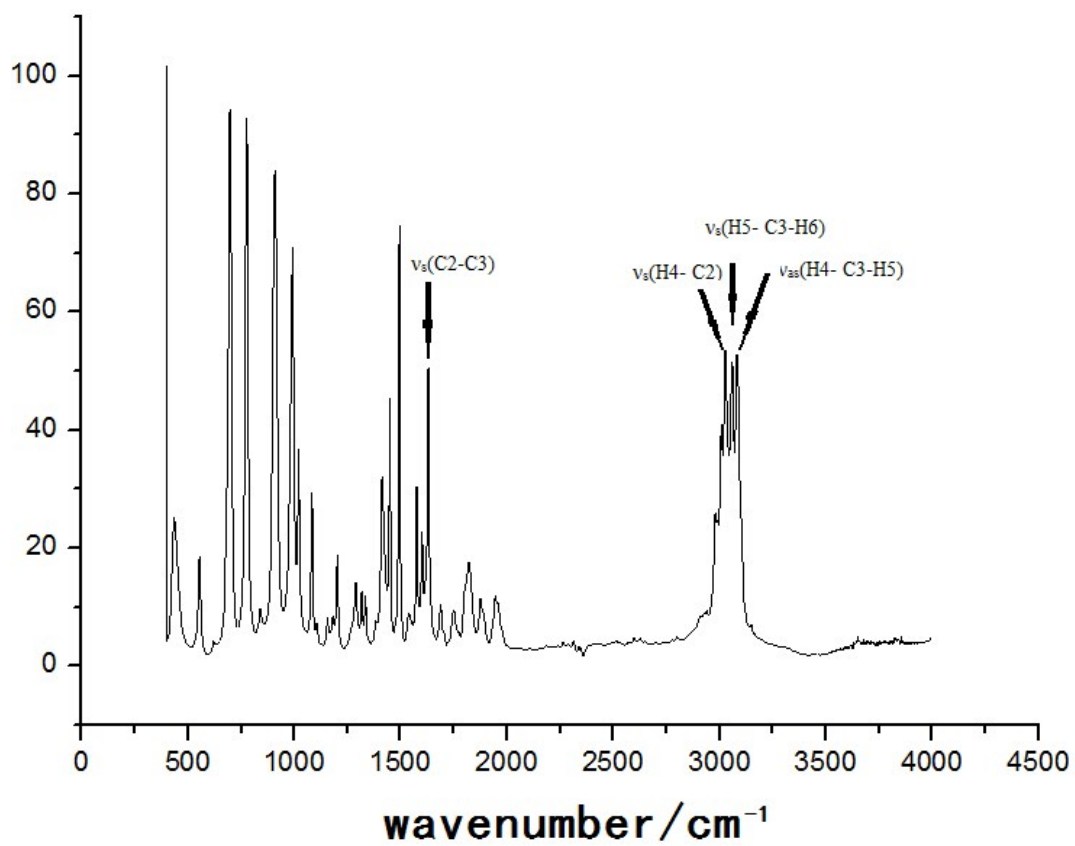

**Fig. S3.** Experimental IR spectrum of styrene

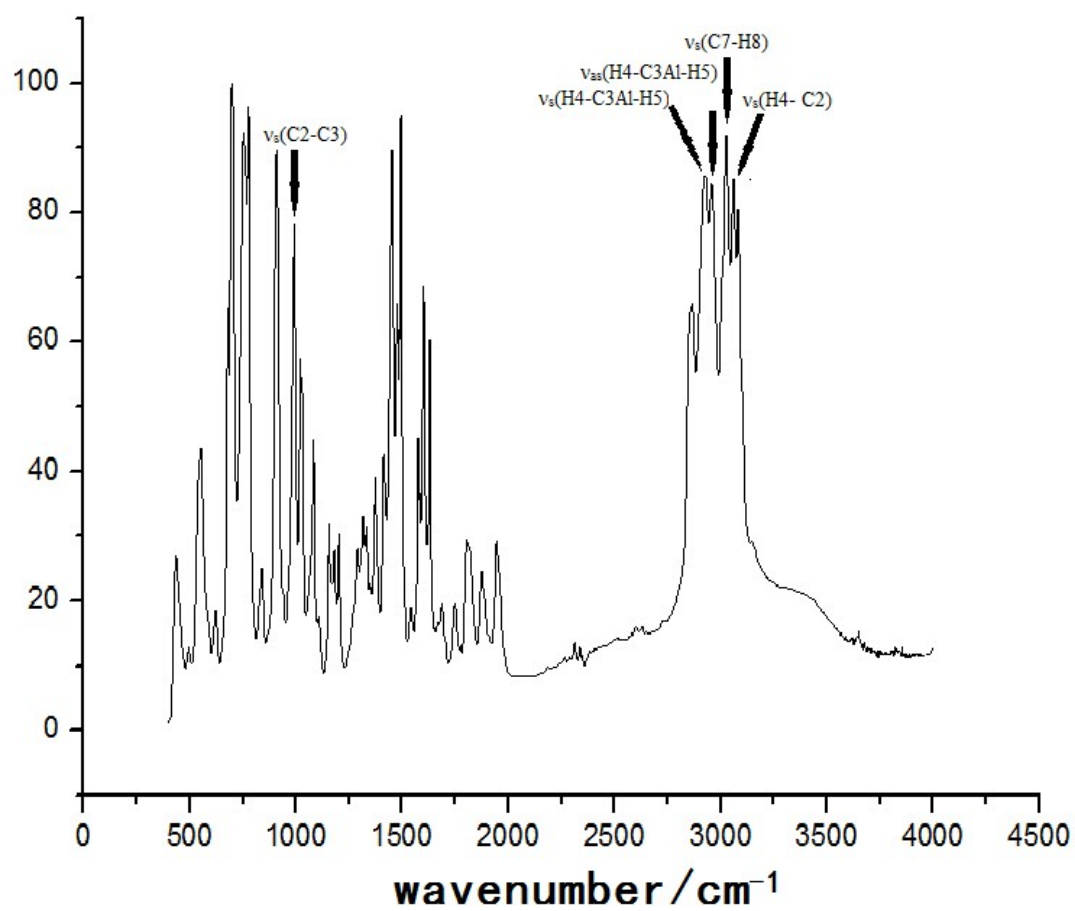

**Fig. S4.** Experimental IR spectrum of styrene+xylene +  $\text{AlCl}_3$ + $[\text{BMIM}][\text{Br}]$ .

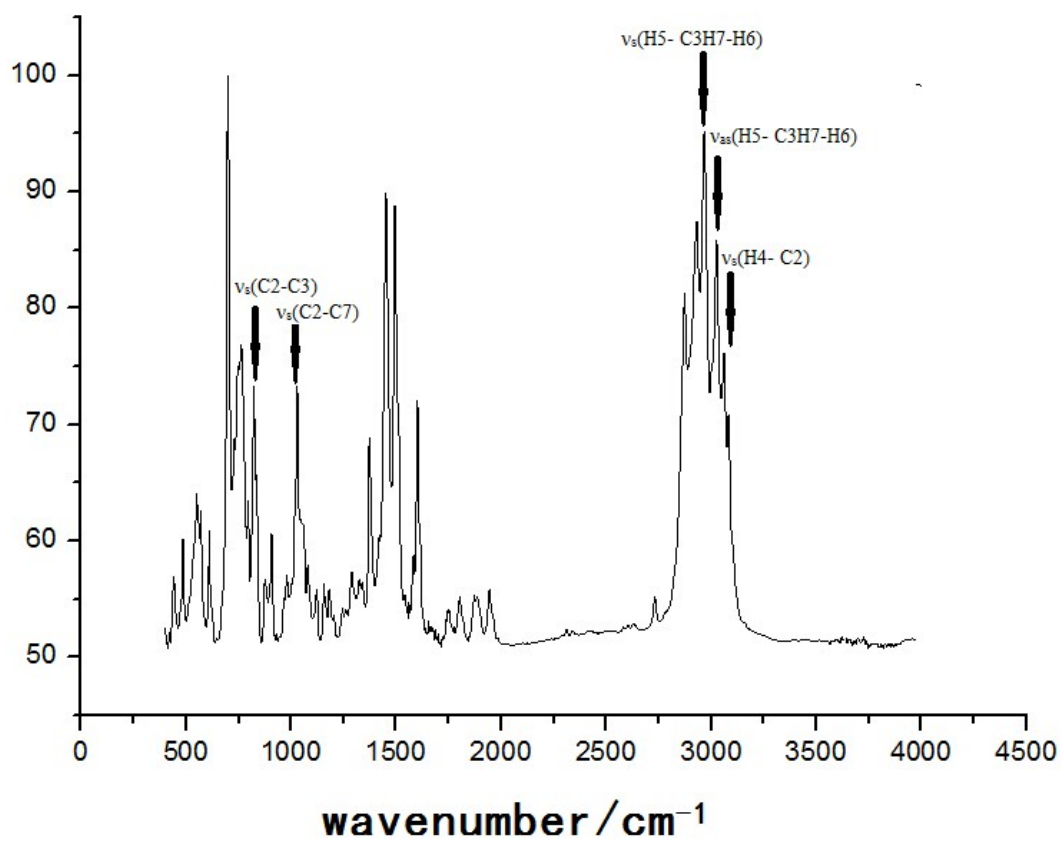

Fig. S5. Experimental IR spectrum of PXE.
